# Supplementary material for: Development of a Scale to Measure Healthy Behaviors in Spanish-Speaking University Students
Source: MDPI journal article supplement (doi:10.3390/ijerph20032627), 2023-02-01
Supplement: s1 [file s1]

Table S1. Attitude to Healthy Behavior Questionnaire

| <b><i>Following are a series of ideas and/or beliefs, indicate your degree of agreement or disagreement with them, where:</i></b> |                          |                            |                         |                       |
|-----------------------------------------------------------------------------------------------------------------------------------|--------------------------|----------------------------|-------------------------|-----------------------|
| <b>Statement</b>                                                                                                                  | <b>Strongly disagree</b> | <b>Moderately disagree</b> | <b>Moderately agree</b> | <b>Strongly agree</b> |
| Evito comer en exceso (I avoid overeating)                                                                                        |                          |                            |                         |                       |
| Mantengo una dieta balanceada (I maintain a balanced diet)                                                                        |                          |                            |                         |                       |
| Suelo consumir alimentos bajos en azúcar (I tend to eat foods low in sugar)                                                       |                          |                            |                         |                       |
| Procuro comer frutas y verduras a diario (I try to eat fruits and vegetables daily)                                               |                          |                            |                         |                       |
| Evito consumir bebidas azucaradas (I avoid sugary drinks)                                                                         |                          |                            |                         |                       |
| <b>Statement</b>                                                                                                                  | <b>Strongly disagree</b> | <b>Moderately disagree</b> | <b>Moderately agree</b> | <b>Strongly agree</b> |
| Realizo ejercicio constantemente (I exercise constantly)                                                                          |                          |                            |                         |                       |
| Me ejercito todas las semanas (I exercise every week)                                                                             |                          |                            |                         |                       |
| Procuro mantener rutinas de ejercicio (I try to maintain exercise routines)                                                       |                          |                            |                         |                       |
| Hago actividad física dos o más veces por semana (I do physical activity two or more times a week)                                |                          |                            |                         |                       |

Strongly disagree = 1 and Strongly agree =4
